# Supplementary material for: Immune Impact Induced by PROSTVAC (PSA-TRICOM), a Therapeutic Vaccine for Prostate Cancer
Source: Oxford University Press journal article supplement (doi:10.1158/2326-6066.cir-13-0108), 2013-11-04
Supplement: 23266066cir130108-sup-tab2.xls [file 23266066cir130108-sup-tab2.xls]

## Sheet: Sheet1
	Number of Cycles with AE (%)			Supplemental Table 2
Adverse Event	Grade 2	Grade 3	Grade 4
Injection Site Reaction	288 (21.5)	2 (0.1)
Fatigue	16 (1.2)	4 (0.3)
Fever	16 (1.2)	2 (0.1)
Myalgia	8 (0.6)	1 (0.1)
Diarrhea	6 (0.4)	2 (0.1)
Leukopenia	5 (0.4)
Anemia	4 (0.3)	1 (0.1)
Flu-Like Symptoms	4 (0.3)
Headache	4 (0.3)
Hypotension	4 (0.3)
Nausea	4 (0.3)
Arthralgia	3 (0.2)
Diaphoresis	3 (0.2)
Rash	3 (0.2)
Abdominal pain/Heartburn	2 (0.1)
Alkaline Phosphatase	2 (0.1)
Bone Pain	2 (0.1)	2 (0.1)
Dyspnea	2 (0.1)	1 (0.1)
Lymphopenia	2 (0.1)
Neutropenia	2 (0.1)
Thrombocytopenia	2 (0.1)	1 (0.1)
Vomiting	2 (0.1)
Allergic Rhinitis	1 (0.1)
ALT	1 (0.1)
Anorexia	1 (0.1)	1 (0.1)
Atrial Fibrillation	1 (0.1)
Back Pain	1 (0.1)
CD4 Lymphs Decreased	1 (0.1)
Dementia	1 (0.1)
Depression	1 (0.1)
Dizziness	1 (0.1)
Hyperglycemia	1 (0.1)
Hypocalcemia	1 (0.1)
LDH Increased	1 (0.1)
Paresthesia	1 (0.1)
Pruritis	1 (0.1)
Swollen lower lip	1 (0.1)
URI	1 (0.1)
Vertigo	1 (0.1)
MI			1 (0.1)
Obstruction, GU		1 (0.1)*
Pleural effusion		1 (0.1)
TTP			1 (0.1)
Weight loss		1 (0.1)
Creatinine	1 (0.1)*
Hyperkalemia	1 (0.1)*
Urinary Frequency	1 (0.1)*
Urinary Retention	1 (0.1)*
*associated with intraprostatic vaccination
All AE's at least possibly due to PSA-TRICOM in 234 patients vaccinated with a total of 1341 vaccinations (1 vaccine = 1 cycle)
